# Supplementary material for: Seed maturation associated transcriptional programs and regulatory networks underlying genotypic difference in seed dormancy and size/weight in wheat (Triticum aestivum L.)
Source: PubMed Central journal article supplement (PMC5603048; doi:10.1186/s12870-017-1104-5), 2017-09-16
Supplement: 12870_2017_1104_MOESM2_ESM.pdf [file 12870_2017_1104_MOESM2_ESM.pdf]

a) AC Domain

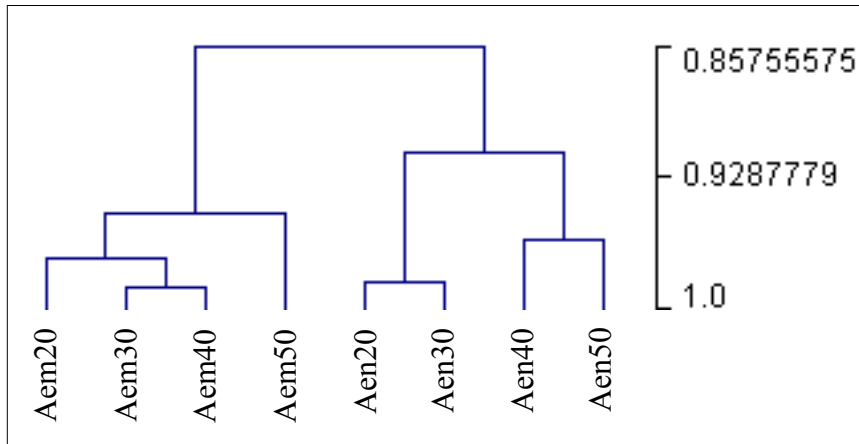

b) RL4452

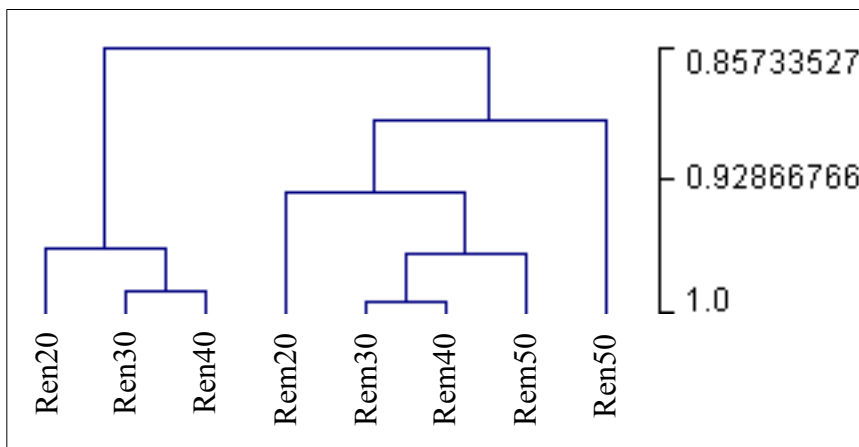

**Figure S2. Hierarchical clustering of the embryo and endosperm by expression patterns of probesets during seed maturation.** Hierarchical tree of clusters showing relationship between maturing embryo and endosperm of AC Domain (A) and RL4452 (B). The scale shows node height for a particular inter-node distance. Aem, AC Domain embryo; Aen, AC Domain endosperm; Rem, RL4452 embryo; Ren, RL4452 endosperm at 20, 30, 40 and 50 days after anthesis (DAA).
