# Supplementary material for: Seed maturation associated transcriptional programs and regulatory networks underlying genotypic difference in seed dormancy and size/weight in wheat (Triticum aestivum L.)
Source: PubMed Central journal article supplement (PMC5603048; doi:10.1186/s12870-017-1104-5), 2017-09-16
Supplement: 12870_2017_1104_MOESM3_ESM.pdf [file 12870_2017_1104_MOESM3_ESM.pdf]

|                       |    | RL4452 Embryo |        |        |        |        |        |        |        |        |        |        |        |        |        |        |        |                       |
|-----------------------|----|---------------|--------|--------|--------|--------|--------|--------|--------|--------|--------|--------|--------|--------|--------|--------|--------|-----------------------|
|                       |    | 20            |        |        |        | 30     |        |        |        | 40     |        |        |        | 50     |        |        |        | Constitutive Multiple |
|                       |    | Rem1          | Rem2   | Rem3   | Rem4   | Rem5   | Rem6   | Rem7   | Rem8   | Rem9   | Rem10  | Rem11  | Rem12  | Rem13  | Rem14  | N/A    |        |                       |
| AC Domain Embryo      | 20 | Aem1          | 56.31% | 24.24% | 2.58%  | 2.55%  | 0.89%  | 0.29%  | 0.51%  | 0.48%  | 0.41%  | 1.46%  | 2.01%  | 0.45%  | 3.15%  | 0.41%  | 4.27%  |                       |
|                       |    | Aem2          | 13.40% | 33.82% | 17.46% | 8.97%  | 8.73%  | 2.40%  | 2.80%  | 0.65%  | 0.45%  | 0.57%  | 4.22%  | 0.57%  | 1.71%  | 1.02%  | 3.25%  |                       |
|                       |    | Aem3          | 6.44%  | 23.70% | 28.79% | 3.16%  | 6.90%  | 1.52%  | 4.86%  | 2.28%  | 0.70%  | 1.11%  | 15.04% | 0.70%  | 1.23%  | 0.82%  | 2.75%  |                       |
|                       |    | Aem4          | 9.76%  | 9.84%  | 5.13%  | 11.61% | 14.55% | 13.96% | 4.79%  | 3.03%  | 2.10%  | 2.44%  | 2.78%  | 2.69%  | 3.03%  | 4.46%  | 9.84%  |                       |
|                       | 30 | Aem5          | 2.70%  | 7.97%  | 21.28% | 4.02%  | 20.55% | 8.96%  | 13.70% | 2.96%  | 0.59%  | 0.40%  | 10.67% | 1.32%  | 0.66%  | 0.99%  | 3.23%  |                       |
|                       |    | Aem6          | 0.93%  | 2.43%  | 2.72%  | 3.43%  | 11.95% | 23.82% | 14.95% | 14.31% | 1.57%  | 1.14%  | 4.58%  | 7.94%  | 0.86%  | 3.58%  | 5.79%  |                       |
|                       |    | Aem7          | 1.57%  | 2.99%  | 10.21% | 1.41%  | 11.37% | 5.71%  | 30.64% | 7.86%  | 0.94%  | 0.52%  | 20.74% | 1.41%  | 0.31%  | 0.79%  | 3.51%  |                       |
|                       |    | Aem8          | 1.20%  | 1.20%  | 1.85%  | 1.30%  | 4.34%  | 8.78%  | 28.28% | 29.88% | 2.39%  | 0.80%  | 6.38%  | 6.78%  | 0.75%  | 1.35%  | 4.74%  |                       |
|                       | 40 | Aem9          | 1.03%  | 0.92%  | 0.71%  | 1.25%  | 2.82%  | 10.65% | 3.31%  | 21.56% | 9.61%  | 2.44%  | 1.47%  | 32.21% | 1.25%  | 3.86%  | 6.90%  |                       |
|                       |    | Aem10         | 1.18%  | 0.81%  | 0.38%  | 1.07%  | 1.18%  | 3.28%  | 0.97%  | 5.27%  | 31.27% | 8.60%  | 0.59%  | 29.61% | 2.42%  | 5.37%  | 8.01%  |                       |
|                       |    | Aem11         | 0.94%  | 0.36%  | 0.25%  | 0.43%  | 0.65%  | 2.21%  | 0.18%  | 1.70%  | 44.25% | 21.62% | 0.36%  | 9.58%  | 2.68%  | 7.48%  | 7.30%  |                       |
|                       |    | Aem12         | 2.21%  | 0.30%  | 0.23%  | 1.07%  | 0.34%  | 1.14%  | 0.17%  | 0.50%  | 13.68% | 53.76% | 0.17%  | 2.48%  | 8.95%  | 5.63%  | 9.36%  |                       |
|                       | 50 | Aem13         | 42.89% | 7.44%  | 1.07%  | 5.70%  | 1.24%  | 0.74%  | 0.41%  | 0.41%  | 2.31%  | 7.44%  | 0.74%  | 0.74%  | 21.57% | 2.15%  | 5.12%  |                       |
|                       |    | Aem14         | 10.69% | 2.34%  | 1.02%  | 2.49%  | 0.88%  | 2.49%  | 1.46%  | 2.93%  | 10.54% | 22.99% | 2.49%  | 2.64%  | 18.89% | 2.93%  | 15.23% |                       |
|                       |    | Aem15         | 2.27%  | 0.10%  | 0.59%  | 2.27%  | 2.87%  | 12.45% | 1.58%  | 5.53%  | 14.53% | 8.60%  | 1.58%  | 19.17% | 2.57%  | 14.82% | 11.07% |                       |
|                       |    | Aem16         | 11.80% | 2.34%  | 0.70%  | 2.97%  | 1.25%  | 1.25%  | 0.55%  | 0.63%  | 5.39%  | 23.75% | 0.86%  | 1.88%  | 32.27% | 6.88%  | 7.50%  |                       |
| Constitutive Multiple |    |               |        |        |        |        |        |        |        |        |        |        |        |        |        |        |        |                       |

**Figure S3. Distribution of probesets in each AC Domain embryonic cluster across the RL4452 clusters.** The number of probesets commonly expressed in each of the AC Domain embryo cluster (Aem1-16) and the RL4452 embryo clusters (Rem1-14) is calculated as a percentage of the total number of probesets expressed in a given AC Domain embryo cluster. The gradient of the red color in the fill represents change in percentage. N/A indicates the percentage of probesets in a given AC Domain embryonic cluster with no expression in RL4452 embryo.
