# Supplementary material for: Seed maturation associated transcriptional programs and regulatory networks underlying genotypic difference in seed dormancy and size/weight in wheat (Triticum aestivum L.)
Source: PubMed Central journal article supplement (PMC5603048; doi:10.1186/s12870-017-1104-5), 2017-09-16
Supplement: 12870_2017_1104_MOESM4_ESM.pdf [file 12870_2017_1104_MOESM4_ESM.pdf]

|                     |                       | RL4452 Endosperm |        |        |        |        |       |        |        |        |        |        |        |        |        |        |        |                       |       |        |        |
|---------------------|-----------------------|------------------|--------|--------|--------|--------|-------|--------|--------|--------|--------|--------|--------|--------|--------|--------|--------|-----------------------|-------|--------|--------|
|                     |                       | 20               |        |        |        | 30     |       |        |        | 40     |        |        |        | 50     |        |        |        | Constitutive Multiple |       |        |        |
|                     |                       | Ren1             | Ren2   | Ren3   | Ren4   | Ren5   | Ren6  | Ren7   | Ren8   | Ren9   | Ren10  | Ren11  | Ren12  | Ren13  | Ren14  | Ren15  | Ren16  | Ren17                 | Ren18 | N/A    |        |
| AC Domain Endosperm | 20                    | Aen1             | 24.53% | 19.33% | 7.24%  | 3.84%  | 1.24% | 3.00%  | 3.67%  | 5.54%  | 3.00%  | 0.62%  | 1.19%  | 0.40%  | 0.73%  | 5.09%  | 2.09%  | 6.95%                 | 1.92% | 2.54%  | 7.07%  |
|                     | 30                    | Aen2             | 5.19%  | 22.47% | 22.91% | 6.11%  | 0.81% | 6.78%  | 2.73%  | 4.49%  | 1.14%  | 0.11%  | 0.29%  | 0.07%  | 0.37%  | 14.00% | 0.52%  | 5.82%                 | 0.74% | 0.55%  | 4.90%  |
|                     |                       | Aen3             | 1.66%  | 5.64%  | 13.18% | 4.28%  | 1.07% | 14.61% | 6.41%  | 12.77% | 1.19%  | 0.24%  | 0.18%  | 0.06%  | 0.30%  | 26.01% | 1.01%  | 5.46%                 | 0.36% | 0.36%  | 5.23%  |
|                     | 40                    | Aen4             | 4.11%  | 13.78% | 18.80% | 12.59% | 1.94% | 9.45%  | 3.13%  | 4.32%  | 0.49%  | 0.16%  | 0.16%  | 0.16%  | 0.54%  | 14.42% | 0.86%  | 3.57%                 | 0.86% | 0.49%  | 10.16% |
|                     |                       | Aen5             | 5.01%  | 11.60% | 5.35%  | 14.11% | 4.89% | 13.88% | 4.78%  | 4.55%  | 1.48%  | 0.46%  | 1.25%  | 0.46%  | 1.59%  | 6.94%  | 1.59%  | 2.84%                 | 2.84% | 1.02%  | 15.36% |
|                     | 50                    | Aen6             | 2.02%  | 2.69%  | 2.69%  | 3.25%  | 2.69% | 17.38% | 21.30% | 15.13% | 4.93%  | 1.57%  | 0.56%  | 0.00%  | 0.11%  | 7.85%  | 2.69%  | 3.14%                 | 0.78% | 1.35%  | 9.87%  |
|                     |                       | Aen7             | 1.86%  | 0.85%  | 0.51%  | 1.69%  | 1.86% | 3.98%  | 21.69% | 7.80%  | 16.78% | 2.80%  | 4.66%  | 1.86%  | 2.29%  | 1.36%  | 13.73% | 2.88%                 | 1.44% | 2.97%  | 8.98%  |
|                     | Constitutive Multiple | Aen8             | 1.31%  | 0.22%  | 0.22%  | 0.27%  | 1.53% | 0.60%  | 3.28%  | 0.87%  | 9.17%  | 7.48%  | 27.40% | 12.12% | 5.35%  | 0.38%  | 16.21% | 1.26%                 | 1.58% | 4.80%  | 5.95%  |
|                     |                       | Aen9             | 0.46%  | 0.14%  | 0.04%  | 0.32%  | 0.57% | 0.07%  | 0.42%  | 0.07%  | 0.81%  | 7.00%  | 5.13%  | 32.66% | 38.03% | 0.07%  | 1.66%  | 0.18%                 | 3.36% | 2.90%  | 6.12%  |
|                     |                       | Aen10            | 0.54%  | 0.08%  | 0.00%  | 0.11%  | 0.16% | 0.14%  | 0.54%  | 0.11%  | 1.44%  | 7.37%  | 15.72% | 44.02% | 18.70% | 0.03%  | 3.14%  | 0.11%                 | 1.33% | 3.44%  | 3.01%  |
|                     |                       | Aen11            | 4.09%  | 1.42%  | 0.18%  | 1.78%  | 6.04% | 3.20%  | 7.10%  | 2.13%  | 6.39%  | 10.30% | 5.86%  | 4.09%  | 7.10%  | 0.89%  | 11.01% | 1.42%                 | 6.22% | 3.20%  | 17.58% |
|                     |                       | Aen12            | 3.64%  | 0.52%  | 0.00%  | 0.94%  | 1.14% | 0.21%  | 1.66%  | 0.42%  | 2.08%  | 9.36%  | 8.42%  | 20.06% | 22.66% | 0.10%  | 4.99%  | 0.52%                 | 7.38% | 5.09%  | 10.81% |
|                     |                       | Aen13            | 5.09%  | 3.13%  | 2.66%  | 1.74%  | 0.93% | 9.14%  | 15.51% | 16.09% | 9.03%  | 1.16%  | 2.08%  | 0.58%  | 1.04%  | 7.18%  | 4.17%  | 9.95%                 | 1.27% | 2.20%  | 7.06%  |
|                     |                       | Aen14            | 10.67% | 4.32%  | 1.02%  | 2.41%  | 2.29% | 2.67%  | 5.08%  | 2.80%  | 4.07%  | 5.72%  | 7.62%  | 3.68%  | 8.13%  | 1.27%  | 8.26%  | 3.56%                 | 9.40% | 8.13%  | 8.89%  |
|                     |                       | Aen15            | 7.96%  | 0.75%  | 0.65%  | 0.54%  | 1.40% | 1.18%  | 3.12%  | 1.40%  | 9.35%  | 3.98%  | 12.90% | 8.49%  | 8.28%  | 0.65%  | 6.34%  | 2.90%                 | 8.60% | 15.27% | 6.24%  |
|                     | Aen16                 | 4.41%            | 4.01%  | 1.20%  | 6.81%  | 7.21%  | 2.00% | 1.80%  | 0.60%  | 2.20%  | 5.41%  | 3.01%  | 2.40%  | 7.62%  | 1.20%  | 4.81%  | 1.40%  | 12.63%                | 2.20% | 29.06% |        |

**Figure S4. Distribution of probesets in each AC Domain endospermic cluster across the RL4452 clusters.** The number of probesets commonly expressed in each of the AC Domain endosperm cluster (Aen1-16) and the RL4452 endosperm clusters (Ren1-18) is calculated as a percentage of the total number of probesets expressed in a given AC Domain endosperm cluster. The gradient of the red color in the fill represents change in percentage. N/A indicates the percentage of probesets in a given AC Domain endospermic cluster with no expression in RL4452 endosperm.
