# Supplementary material for: Seed maturation associated transcriptional programs and regulatory networks underlying genotypic difference in seed dormancy and size/weight in wheat (Triticum aestivum L.)
Source: PubMed Central journal article supplement (PMC5603048; doi:10.1186/s12870-017-1104-5), 2017-09-16
Supplement: 12870_2017_1104_MOESM5_ESM.pdf [file 12870_2017_1104_MOESM5_ESM.pdf]

|               |    | AC Domain Embryo |        |        |        |        |        |        |        |        |        |        |        |        |        |       |        | #N/A   |                       |  |  |  |
|---------------|----|------------------|--------|--------|--------|--------|--------|--------|--------|--------|--------|--------|--------|--------|--------|-------|--------|--------|-----------------------|--|--|--|
|               |    | 20               |        |        |        | 30     |        |        |        | 40     |        |        |        | 50     |        |       |        |        | Constitutive Multiple |  |  |  |
|               |    | Aem1             | Aem2   | Aem3   | Aem4   | Aem5   | Aem6   | Aem7   | Aem8   | Aem9   | Aem10  | Aem11  | Aem12  | Aem13  | Aem14  | Aem15 | Aem16  |        |                       |  |  |  |
| RL4452 Embryo | 20 | Rem1             | 46.43% | 8.67%  | 2.89%  | 3.05%  | 1.08%  | 0.34%  | 0.79%  | 0.63%  | 0.50%  | 0.58%  | 0.68%  | 1.73%  | 13.63% | 1.92% | 0.60%  | 3.97%  | 12.53%                |  |  |  |
|               |    | Rem2             | 28.05% | 30.70% | 14.93% | 4.31%  | 4.46%  | 1.25%  | 2.10%  | 0.88%  | 0.63%  | 0.55%  | 0.37%  | 0.33%  | 3.32%  | 0.59% | 0.04%  | 1.11%  | 6.38%                 |  |  |  |
|               |    | Rem3             | 4.47%  | 23.70% | 27.12% | 3.36%  | 17.81% | 2.09%  | 10.75% | 2.04%  | 0.72%  | 0.39%  | 0.39%  | 0.39%  | 0.72%  | 0.39% | 0.33%  | 0.50%  | 4.85%                 |  |  |  |
|               |    | Rem4             | 8.12%  | 22.44% | 5.48%  | 14.01% | 6.19%  | 4.87%  | 2.74%  | 2.64%  | 2.34%  | 2.03%  | 1.22%  | 3.25%  | 7.01%  | 1.73% | 2.34%  | 3.86%  | 9.75%                 |  |  |  |
|               | 30 | Rem5             | 1.78%  | 13.70% | 7.52%  | 11.03% | 19.89% | 10.64% | 13.83% | 5.54%  | 3.31%  | 1.40%  | 1.15%  | 0.64%  | 0.96%  | 0.38% | 1.85%  | 1.02%  | 5.35%                 |  |  |  |
|               |    | Rem6             | 0.55%  | 3.62%  | 1.59%  | 10.18% | 8.34%  | 20.42% | 6.68%  | 10.79% | 12.02% | 3.74%  | 3.74%  | 2.08%  | 0.55%  | 1.04% | 7.73%  | 0.98%  | 5.95%                 |  |  |  |
|               |    | Rem7             | 0.79%  | 3.39%  | 4.08%  | 2.80%  | 10.23% | 10.28% | 28.76% | 27.88% | 3.00%  | 0.88%  | 0.25%  | 0.25%  | 0.25%  | 0.49% | 0.79%  | 0.34%  | 5.56%                 |  |  |  |
|               |    | Rem8             | 0.78%  | 0.84%  | 2.04%  | 1.88%  | 2.35%  | 10.45% | 7.84%  | 31.31% | 20.75% | 5.12%  | 2.46%  | 0.78%  | 0.26%  | 1.05% | 2.93%  | 0.42%  | 8.73%                 |  |  |  |
|               | 40 | Rem9             | 0.42%  | 0.36%  | 0.39%  | 0.81%  | 0.29%  | 0.71%  | 0.58%  | 1.56%  | 5.75%  | 18.90% | 39.75% | 13.25% | 0.91%  | 2.34% | 4.77%  | 2.24%  | 6.95%                 |  |  |  |
|               |    | Rem10            | 1.27%  | 0.39%  | 0.52%  | 0.80%  | 0.17%  | 0.44%  | 0.28%  | 0.44%  | 1.24%  | 4.40%  | 16.45% | 44.10% | 2.48%  | 4.32% | 2.39%  | 8.36%  | 11.97%                |  |  |  |
|               |    | Rem11            | 4.41%  | 7.29%  | 18.01% | 2.31%  | 11.35% | 4.48%  | 27.75% | 8.97%  | 1.89%  | 0.77%  | 0.70%  | 0.35%  | 0.63%  | 1.19% | 1.12%  | 0.77%  | 7.99%                 |  |  |  |
|               |    | Rem12            | 0.63%  | 0.63%  | 0.54%  | 1.45%  | 0.91%  | 5.02%  | 1.22%  | 6.16%  | 26.84% | 24.94% | 12.00% | 3.35%  | 0.41%  | 0.81% | 8.78%  | 1.09%  | 5.21%                 |  |  |  |
|               | 50 | Rem13            | 5.68%  | 2.41%  | 1.21%  | 2.07%  | 0.57%  | 0.69%  | 0.34%  | 0.86%  | 1.32%  | 2.58%  | 4.25%  | 15.33% | 14.98% | 7.41% | 1.49%  | 23.71% | 15.10%                |  |  |  |
|               |    | Rem14            | 1.11%  | 2.13%  | 1.19%  | 4.51%  | 1.28%  | 4.25%  | 1.28%  | 2.30%  | 6.04%  | 8.50%  | 17.60% | 14.29% | 2.21%  | 1.70% | 12.76% | 7.48%  | 11.39%                |  |  |  |
| Multiple      |    |                  |        |        |        |        |        |        |        |        |        |        |        |        |        |       |        |        |                       |  |  |  |
|               |    |                  |        |        |        |        |        |        |        |        |        |        |        |        |        |       |        |        |                       |  |  |  |

**Figure S5. Distribution of probesets in each RL4452 embryonic module across the AC Domain modules.** The number of probesets commonly expressed in each of the RL4452 embryo module (Rem1-14) and the AC Domain embryo modules (Aem1-16) is calculated as a percentage of the total number of probesets expressed in a given RL4452 embryo module. The gradient of the red color in the fill represents change in percentage. N/A indicates the percentage of probesets in a given RL4452 embryonic module with no expression in AC Domain embryo.
