# Supplementary material for: Seed maturation associated transcriptional programs and regulatory networks underlying genotypic difference in seed dormancy and size/weight in wheat (Triticum aestivum L.)
Source: PubMed Central journal article supplement (PMC5603048; doi:10.1186/s12870-017-1104-5), 2017-09-16
Supplement: 12870_2017_1104_MOESM6_ESM.pdf [file 12870_2017_1104_MOESM6_ESM.pdf]

|                  |    | AC Domain Endosperm |        |        |        |        |        |        |        |        |        |        |       |       |        |       |        | #N/A  |                       |
|------------------|----|---------------------|--------|--------|--------|--------|--------|--------|--------|--------|--------|--------|-------|-------|--------|-------|--------|-------|-----------------------|
|                  |    | 20                  |        |        |        | 30     |        |        |        | 40     |        |        |       | 50    |        |       |        |       | Constitutive Multiple |
|                  |    | Aen1                | Aen2   | Aen3   | Aen4   | Aen5   | Aen6   | Aen7   | Aen8   | Aen9   | Aen10  | Aen11  | Aen12 | Aen13 | Aen14  | Aen15 | Aen16  |       |                       |
| RL4452 Endosperm | 20 | Ren1                | 31.34% | 10.18% | 2.02%  | 5.49%  | 3.18%  | 1.30%  | 1.59%  | 1.73%  | 0.94%  | 1.44%  | 1.66% | 2.53% | 3.18%  | 6.06% | 5.34%  | 1.59% | 20.43%                |
|                  |    | Ren2                | 19.41% | 34.62% | 5.39%  | 14.47% | 5.79%  | 1.36%  | 0.57%  | 0.23%  | 0.23%  | 0.17%  | 0.45% | 0.28% | 1.53%  | 1.93% | 0.40%  | 1.14% | 12.03%                |
|                  |    | Ren3                | 8.30%  | 40.31% | 14.39% | 22.55% | 3.05%  | 1.56%  | 0.39%  | 0.26%  | 0.06%  | 0.00%  | 0.06% | 0.00% | 1.49%  | 0.52% | 0.39%  | 0.39% | 6.29%                 |
|                  | 30 | Ren4                | 6.69%  | 16.34% | 7.09%  | 22.93% | 12.20% | 2.85%  | 1.97%  | 0.49%  | 0.89%  | 0.39%  | 0.98% | 0.89% | 1.48%  | 1.87% | 0.49%  | 3.35% | 19.09%                |
|                  |    | Ren5                | 4.08%  | 4.08%  | 3.34%  | 6.68%  | 7.98%  | 4.45%  | 4.08%  | 5.19%  | 2.97%  | 1.11%  | 6.31% | 2.04% | 1.48%  | 3.34% | 2.41%  | 6.68% | 33.77%                |
|                  |    | Ren6                | 4.10%  | 14.24% | 19.04% | 13.54% | 9.44%  | 12.00% | 3.64%  | 0.85%  | 0.15%  | 0.39%  | 1.39% | 0.15% | 6.11%  | 1.63% | 0.85%  | 0.77% | 11.69%                |
|                  | 40 | Ren7                | 5.07%  | 5.77%  | 8.42%  | 4.52%  | 3.27%  | 14.81% | 19.95% | 4.68%  | 0.94%  | 1.56%  | 3.12% | 1.25% | 10.44% | 3.12% | 2.26%  | 0.70% | 10.13%                |
|                  |    | Ren8                | 8.67%  | 10.80% | 19.03% | 7.08%  | 3.54%  | 11.95% | 8.14%  | 1.42%  | 0.18%  | 0.35%  | 1.06% | 0.35% | 12.30% | 1.95% | 1.15%  | 0.27% | 11.77%                |
|                  |    | Ren9                | 5.22%  | 3.05%  | 1.97%  | 0.89%  | 1.28%  | 4.33%  | 19.49% | 16.54% | 2.26%  | 5.22%  | 3.54% | 1.97% | 7.68%  | 3.15% | 8.56%  | 1.08% | 13.78%                |
|                  | 50 | Ren10               | 0.95%  | 0.26%  | 0.35%  | 0.26%  | 0.35%  | 1.21%  | 2.86%  | 11.88% | 17.17% | 23.59% | 5.03% | 7.81% | 0.87%  | 3.90% | 3.21%  | 2.34% | 17.95%                |
|                  |    | Ren11               | 1.15%  | 0.44%  | 0.16%  | 0.16%  | 0.60%  | 0.27%  | 3.01%  | 27.49% | 7.94%  | 31.76% | 1.81% | 4.44% | 0.99%  | 3.29% | 6.57%  | 0.82% | 9.09%                 |
|                  |    | Ren12               | 0.20%  | 0.06%  | 0.03%  | 0.09%  | 0.12%  | 0.00%  | 0.64%  | 6.45%  | 26.84% | 47.18% | 0.67% | 5.61% | 0.15%  | 0.84% | 2.30%  | 0.35% | 8.48%                 |
|                  |    | Ren13               | 0.45%  | 0.34%  | 0.17%  | 0.34%  | 0.48%  | 0.03%  | 0.93%  | 3.38%  | 37.08% | 23.78% | 1.38% | 7.51% | 0.31%  | 2.21% | 2.65%  | 1.31% | 17.64%                |
|                  |    | Ren14               | 5.92%  | 25.02% | 28.83% | 17.58% | 4.02%  | 4.61%  | 1.05%  | 0.46%  | 0.13%  | 0.07%  | 0.33% | 0.07% | 4.08%  | 0.66% | 0.39%  | 0.39% | 6.39%                 |
|                  |    | Ren15               | 3.15%  | 1.19%  | 1.45%  | 1.36%  | 1.19%  | 2.04%  | 13.80% | 25.30% | 4.00%  | 9.88%  | 5.28% | 4.09% | 3.07%  | 5.54% | 5.03%  | 2.04% | 11.58%                |
|                  |    | Ren16               | 14.89% | 19.13% | 11.14% | 7.99%  | 3.03%  | 3.39%  | 4.12%  | 2.78%  | 0.61%  | 0.48%  | 0.97% | 0.61% | 10.41% | 3.39% | 3.27%  | 0.85% | 12.95%                |
|                  |    | Ren17               | 3.79%  | 2.23%  | 0.67%  | 1.79%  | 2.79%  | 0.78%  | 1.90%  | 3.24%  | 10.60% | 5.47%  | 3.91% | 7.92% | 1.23%  | 8.26% | 8.93%  | 7.03% | 29.46%                |
|                  |    | Ren18               | 5.28%  | 1.76%  | 0.70%  | 1.06%  | 1.06%  | 1.41%  | 4.10%  | 10.32% | 9.61%  | 14.89% | 2.11% | 5.74% | 2.23%  | 7.50% | 16.65% | 1.29% | 14.30%                |

**Figure S6. Distribution of probesets in each RL4452 endospermic module across the AC Domain modules.** The number of probesets commonly expressed in each of the RL4452 endosperm module (Ren1-18) and the AC Domain endosperm modules (Aen1-16) is calculated as a percentage of the total number of probesets expressed in a given RL4452 endosperm module. The gradient of the red color in the fill represents change in percentage. N/A indicates the percentage of probesets in a given RL4452 endospermic module with no expression in AC Domain endosperm.
